# Supplementary material for: Virulence Characteristics and Distribution of the Pathogen Listeria ivanovii in the Environment and in Food
Source: MDPI journal article supplement (doi:10.3390/microorganisms10081679), 2022-08-20
Supplement: s1 [file s1]

**Table S1.** Reports of *L. ivanovii* isolation from food products in chronological order with type of food, total number of samples tested in the same study, country, analytical methods used and reference.

| Food                                                      | Total samples tested | Country    | Analytical methods <sup>1</sup> | Number and (%) of samples contaminated with <i>L. ivanovii</i> | <i>L. ivanovii</i> positive food samples and number                         | Reference |
|-----------------------------------------------------------|----------------------|------------|---------------------------------|----------------------------------------------------------------|-----------------------------------------------------------------------------|-----------|
| Commercial fresh seafood (retail)                         | 683                  | Japan      | b                               | 2 (0.3)                                                        | Fish                                                                        | [74]      |
| Fresh, frozen and dry seafoods (retail)                   | 38                   | India      | b (different methods)           | 6 (15.8)                                                       | Local fish doma (2); crab (2); dry fish shrimp (2)                          | [70]      |
| Fresh meat and meat products (retail)                     | 27                   | India      | b (different methods)           | 8 (29.6)                                                       | Pork cocktail (2); chicken sausages (2); pork salami (2); raw chicken (2)   | [70]      |
| Raw ewe milk                                              | 1,052                | Spain      | b                               | 2 (0.2)                                                        |                                                                             | [121]     |
| Raw goat milk (farm)                                      | 1445                 | Spain      | a3, c1                          | 3 (0.2)                                                        |                                                                             | [124]     |
| Fresh filleted fish                                       | 135                  | Costa Rica | a2                              | 3 (2.2)                                                        | Filets de bar and dorate                                                    | [75]      |
| Ready to eat (retail) and raw food                        | 429                  | Portugal   | b                               | 6 (1.6)                                                        | Cheese (3); RTE meat (1); raw milk (2)                                      | [52]      |
| Smoked fish and pâté                                      | 352                  | Spain      | a2                              | 2 (0.6)                                                        | Opened cold-smoked salmon (1); vacuum-packed cold-smoked trout (1)          | [71]      |
| Ready to eat and raw food in restaurant                   | 103                  | Spain      | a3                              | 6 (5.8)                                                        | lettuce (3); RTE lettuce (1); raw pork (2)                                  | [109]     |
| Local and imported meat and fermented fish (retail)       | 101                  | Malaysia   | b,                              | 36 (35.6)                                                      | Imported frozen beef (14); local frozen meat (9); fermented Kedah fish (13) | [72]      |
| Raw cow milk                                              | 1300                 | Mexico     | a3                              | 82 (6.3)                                                       |                                                                             | [113]     |
| Fresh vegetables (retail)                                 | 188                  | Italy      | a2                              | 1 (0.5)                                                        | lettuce                                                                     | [144]     |
| Raw ewes milk                                             | 542                  | Spain      | a3                              | 5 (0.9)                                                        |                                                                             | [122]     |
| Swabs on lamb carcass surfaces (abattoir)                 | 69                   | Brazil     | a2                              | 1 (1.4)                                                        |                                                                             | [104]     |
| Meat and milk products (retail)                           | 316                  | Ethiopia   | a1.1                            | 1 (0.3)                                                        | Minced beef                                                                 | [91]      |
| Frozen seafood (retail)                                   | 213                  | Italy      | a2                              | 5 (2.3)                                                        | Mussels (3); cam (1); shrimp (1)                                            | [76]      |
| Raw milk (dairy plants), cheese, yoghurt, butter (retail) | 157                  | Turkey     | a3                              | 4 (2.5)                                                        | Raw milk (1); Turkish white cheese (3)                                      | [53]      |
| Catfish fillets                                           | 240                  | USA        | a3, c                           | 2 (0.8)                                                        |                                                                             | [85]      |

|                                                                    |      |           |            |           |                                                                 |       |
|--------------------------------------------------------------------|------|-----------|------------|-----------|-----------------------------------------------------------------|-------|
| RTE fresh-cut fruits and vegetables in MAP (retail)                | 720  | Ireland   | a2, c      | 1 (0.1)   | Bean sprouts                                                    | [145] |
| Rabbit carcasses (abattoir) and rabbit raw meat (retail)           | 51   | Spain     | a3, IMS, c | 1 (2.0)   |                                                                 | [108] |
| RTE Turkish sausage (Soudjouck)                                    | 100  | Turkey    | A3         | 1 (1.0)   |                                                                 | [90]  |
| Animal food products (street markets)                              | 1481 | Colombia  | b, c       | 32 (2.2)  | Cheeses type "costeño" (32)                                     | [54]  |
| Homemade white cheeses (bazaar)                                    | 142  | Turkey    | a3         | 3 (2.1)   |                                                                 | [55]  |
| Bulk untreated sheep, goat and sheep-goat milk (farms)             | 246  | Italy     | a1.1, c    | 1 (0.4)   |                                                                 | [56]  |
| Sheep-goat cheese (dairy plants)                                   | 71   | Italy     | a1.1, c    | 2 (2.8)   |                                                                 | [56]  |
| Smoked fish (retail)                                               | 115  | Nigeria   | a1.1       | 15 (13)   |                                                                 | [73]  |
| Various raw and RTE meat                                           | 786  | Bulgaria  | a1.1       | 5 (0.6)   | Minced beef (2) and pork (1); raw-dried sausage (2)             | [89]  |
| Raw and RTE foods (retail)                                         | 711  | Ethiopia  | a1.1       | 4 (0.6)   | Minced beef (2); soft cheese (2)                                | [57]  |
| Vegetables leafy collected                                         | 10   | Nigeria   | b          | 1         |                                                                 | [152] |
| Fresh vegetables (retail)                                          | 192  | Venezuela | a7         | 48 (25.0) | Tomato (16); coriander (32)                                     | [151] |
| Meat and chicken products                                          | 100  | Egypt     | a3, c      | 7 (7)     | Luncheon (1); frozen chicken fillet (3); frozen chicken leg (3) | [86]  |
| Raw meat and RTE products (schools' refectories, restaurant, etc.) | 1268 | Italy     | a1.1       | 10 (0.8)  | Only raw meat (no. 575 total samples) 1.7%                      | [105] |
| Raw and RTE foods (retail)                                         | 380  | Thailand  | a1.1       | 3 (0.8)   |                                                                 | [146] |
| Raw and processed meats                                            | 109  | India     | a2, c      | 1 (0.9)   |                                                                 | [127] |
| White cheeses                                                      | 30   | Venezuela | a3, c      | 3 (10.0)  |                                                                 | [59]  |
| Fresh fish (retail)                                                | 100  | Turkey    | a2+IMS     | 1 (1)     | Trout                                                           | [77]  |
| Village cheeses without starter cultures (bazaars)                 | 58   | Turkey    | a1.1       | 1 (1.7)   |                                                                 | [58]  |
| Raw and RTE foods (retail, cafeterias)                             | 391  | Ethiopia  | a3         | 2 (0.5)   | Raw beef and liquid whole egg                                   | [92]  |
| Raw milk                                                           | 250  | Turkey    | a3         | 1 (0.4)   |                                                                 | [60]  |
| Herby cheese                                                       | 254  | Turkey    | a3         | 1 (0.4)   |                                                                 | [60]  |

|                                                         |     |              |         |           |                                                                                                                                                                     |       |
|---------------------------------------------------------|-----|--------------|---------|-----------|---------------------------------------------------------------------------------------------------------------------------------------------------------------------|-------|
| Fresh whole fish (retail)                               | 194 | Iran         | b, c    | 7 (3.6)   |                                                                                                                                                                     | [78]  |
| Traditional RTE foods                                   | 100 | Jordan       | a3      | 20 (20.0) | Dairy product (8);<br>other RTE (12)                                                                                                                                | [114] |
| Raw cow's milk                                          | 20  | Jordan       | a3      | 7 (35)    |                                                                                                                                                                     | [114] |
| Fresh chicken-neck skin<br>(abattoir)                   | 160 | Jordan       | a1.1, c | 48 (30.0) |                                                                                                                                                                     | [87]  |
| RTE chicken products<br>(retail, restaurant)            | 120 | Jordan       | a1.1, c | 25 (20.8) | Chicken-shawirma<br>(20); chicken-burger<br>(3); chicken-sausage<br>(2)                                                                                             | [87]  |
| Fish grey-mullet roe<br>( <i>Mugil cephalus</i> )       | 48  | Greece       | a2      | 3 (6.3)   |                                                                                                                                                                     | [79]  |
| Raw poultry (retail)                                    | 100 | Spain        | a2      | 1 (1.0)   |                                                                                                                                                                     | [88]  |
| RTE foods (various<br>places)                           | 227 | Algeria      | a4      | 3 (1.3)   |                                                                                                                                                                     | [147] |
| Raw and RTE poultry<br>products (retail,<br>restaurant) | 402 | Iran         | a2, c   | 13 (3.2)  | Poultry products: raw<br>(10); RTE (3)                                                                                                                              | [131] |
| RTE foods                                               | 252 | South Africa | b       | 51 (20.2) | Chicken stew (11);<br>beef stew (6);<br>vegetables (8); rice (6),<br>potatoes (6); pies (14)                                                                        | [138] |
| Raw and RTE various<br>food (local retail)              | 400 | Taiwan       | a1.1    | 4 (1)     | Not specified                                                                                                                                                       | [148] |
| Cheeses and dairy<br>desserts (retail)                  | 300 | Turkey       | a3      | 2 (0.7)   | Mihalic cheese (2)                                                                                                                                                  | [61]  |
| Brined white cheese<br>(retail)                         | 350 | Jordan       | a1.1, c | 14 (4.0)  |                                                                                                                                                                     | [62]  |
| Raw cow's milk (farm)                                   | 192 | Nigeria      | a1.1    | 8 (4.2)   |                                                                                                                                                                     | [115] |
| Raw milk                                                | 766 | Syria        | a3, c   | 12 (1.6)  | Cow milk (7); sheep<br>milk (5)                                                                                                                                     | [116] |
| Broiler chicken RTE<br>(restaurant)                     | 250 | Sudan        | a1.1    | 52 (20.8) | Frozen chicken burger<br>(14); frozen chicken<br>sausages (4);<br>frozen chicken meat<br>balls (kofta) (15);<br>chicken shawarma (6);<br>chicken mortadella<br>(13) | [143] |

|                                                      |     |                     |         |           |                                                                                                    |       |
|------------------------------------------------------|-----|---------------------|---------|-----------|----------------------------------------------------------------------------------------------------|-------|
| Soft cheese, raw milk, red and chicken meat (retail) | 225 | Iraq                | a3, c   | 1 (0.4)   | Soft cheese                                                                                        | [63]  |
| Raw and RTE meat                                     | 250 | Egypt               | b, c    | 1 (0.4)   | Raw meat kofta                                                                                     | [134] |
| RTE vegetables (retail)                              | 100 | Croatia             | a1.1    | 5 (5.0)   | Iceberg lettuces (3); delicatessen salads (1); shredded cabbages (1)                               | [142] |
| Raw fish (retail)                                    | 300 | Iran                | a1.1, c | 3 (1)     | Fresh fish                                                                                         | [80]  |
| RTE foods (retail)                                   | 336 | Nigeria             | a3      | 31 (9.2)  | Lettuce (10); cabbage (9); meat pie (4); other RTE meat (8)                                        | [135] |
| Frozen raw fish (imported)                           | 219 | Egypt               | a1.1, c | 2 (0.9)   | Flesh catfish                                                                                      | [81]  |
| RTE sandwiches (street vendors)                      | 270 | Turkey              | a1.1    | 5 (1.9)   | With cheese (1); with soudjouk (dried beef sausage) and salad (3); with soudjouk without salad (1) | [139] |
| Fresh Tilapia nilotica (retail and farm)             | 100 | Egypt               | a3, c   | 8 (8.0)   | Samples in retail (6); samples in farm (2)                                                         | [82]  |
| Raw cow and goat meat (retail)                       | 240 | Nigeria             | a2, c   | 4 (1.7)   | Cow flesh (2); cow kidney (1) and liver (1)                                                        | [93]  |
| Raw and RTE food products of animal origin (retail)  | 180 | Egypt               | a2      | 4 (2.2)   | Raw lean beef (1); frozen lean beef (2); raw milk (1)                                              | [94]  |
| Raw meat and meat products (retail)                  | 300 | Nigeria             | b, c    | 19 (6.3)  | Raw meat (5); meat products (14, of which no. 10 of Suya, a smoked spiced meat)                    | [136] |
| Raw various animal milk                              | 260 | Iran                | a2, c   | 2 (0.8)   | Bovine milk (1); ovine milk (1)                                                                    | [117] |
| Meat products (retail)                               | 552 | Brazil              | a1, c   | 1 (0.2)   | Chicken leg                                                                                        | [95]  |
| Raw meat and RTE meat (retail)                       | 270 | Jordan              | a1.1, c | 73 (27.0) | Raw meat (19)<br>RTE meat (54)                                                                     | [106] |
| Various food                                         | 432 | Republic of Ireland | a1.1, c | 1 (0.2)   | Meat sausage                                                                                       | [28]  |

|                                                                       |     |          |         |           |                                                          |       |
|-----------------------------------------------------------------------|-----|----------|---------|-----------|----------------------------------------------------------|-------|
| Raw frozen and fresh chicken meat                                     | 120 | Nigeria  | b       | 2 (1.7)   | Frozen (1) and fresh (1) meat                            | [132] |
| Raw and RTE foods of animal origin (retail, restaurant)               | 384 | Ethiopia | a1      | 2 (0.5)   | Raw meat (2)                                             | [107] |
| Raw milk, dairy and meat products (retail markets and grocery stores) | 233 | Egypt    | a3      | 5 (2.2)   | Raw milk (2); Kareish cheese (1); butter (1); burger (1) | [50]  |
| Raw chicken meat (farm)                                               | 80  | Egypt    | a1, c   | 9 (11,3)  |                                                          | [133] |
| Raw zebu milk                                                         | 103 | Tanzania | a1.1    | 2 (1.9)   |                                                          | [126] |
| Homemade cheeses (village bazaars)                                    | 279 | Turkey   | a1.1    | 6 (2.2)   |                                                          | [64]  |
| Raw meat and vegetables (retail)                                      | 330 | Nigeria  | a3      | 44 (13.3) | Red meat (17); chicken (6); vegetable (21)               | [96]  |
| Raw milk and meat (retail)                                            | 250 | Egypt    |         | 2 (0.8)   | Beef burger (1); sausage (1)                             | [97]  |
| Raw milk and milk products                                            | 550 | Nigeria  | b, c    | 27 (4.9)  | Not specified                                            | [128] |
| Raw milk                                                              | 200 | Turkey   | a1.1, c | 1 (0.5)   | Cow milk                                                 | [118] |
| Raw milk, cheese, butter (retail)                                     | 300 | Turkey   | a3, c   | 8 (2.7)   | Raw milk (5); white cheese (2); butter (1)               | [51]  |
| RTE foods (retail)                                                    | 411 | Nigeria  | a1.2    | 6 (1.5)   |                                                          | [149] |

|                                                                             |     |         |         |          |                                                                                          |       |
|-----------------------------------------------------------------------------|-----|---------|---------|----------|------------------------------------------------------------------------------------------|-------|
| Raw milk (dairy animals)                                                    | 60  | Egypt   | b, c    | 3 (5.0)  | cow (1); buffalo (1);<br>ewe (1)                                                         | [111] |
| Cheeses (processing<br>plant output shops)                                  | 120 | Turkey  | a1.1    | 6 (5.0)  |                                                                                          | [65]  |
| Raw and pasteurized<br>milk and cheeses                                     | 110 | Turkey  | a1.1    | 6 (5.5)  | Raw milk (1); cheese<br>(5)                                                              | [66]  |
| Raw and pasteurized<br>milk and cheeses                                     | 200 | Turkey  | a1.1, c | 7 (3.5)  | Raw milk (3); white<br>cheese (1); homemade<br>cheese (3)                                | [67]  |
| Raw ground beef, and<br>chicken meat (retail)                               | 124 | Turkey  | a1.1    | 5 (4.0)  | Ground beef (5)                                                                          | [98]  |
| Pig carcasses                                                               | 150 | Italy   |         | 17(11.3) |                                                                                          | [110] |
| Raw cow's milk (dairy<br>farms)                                             | 200 | Egypt   | b, c    | 12 (6)   |                                                                                          | [119] |
| Milk (private farms and<br>retail)                                          | 250 | Egypt   | b, c    | 5 (2)    | Cow milk (2); Buffalo<br>milk (2); ewe milk (1)                                          | [112] |
| Refrigerated and frozen<br>RTE meatballs (various<br>Turkish type) (retail) | 290 | Turkey  | a2, c   | 9 (3.1)  | Frozen turkey<br>meatballs (1);<br>refrigerated (7) and<br>frozen (1) beef<br>meatballs  | [140] |
| Raw meat and meat<br>products (retail)                                      | 120 | Egypt   | a1.1, c | 12 (10)  | Minced meat (2);<br>Kofta (1); sausage (2);<br>burger (3); luncheon<br>(2); Pasterma (2) | [137] |
| Frozen raw beef and<br>chicken meat                                         | 240 | Nigeria | a3, c   | 12 (5.0) | Beef meat (7); chicken<br>meat (5)                                                       | [99]  |

|                                                       |     |          |         |           |                                                                                |       |
|-------------------------------------------------------|-----|----------|---------|-----------|--------------------------------------------------------------------------------|-------|
| RTE meat sandwiches (retail)                          | 120 | Egypt    | b, c    | 1 (0.8)   | Beefburger                                                                     | [141] |
| Raw and RTE foods (retail)                            | 200 | Libya    | a1.1, c | 15 (7.5)  | Raw milk (7); kariesh cheese (2); beef meat (1); hot dog (2); Tilapia fish (3) | [68]  |
| Raw meat                                              | 104 | Nigeria  | a1.1    | 22 (21.2) | Beef meat (12); Chevon meat (10)                                               | [100] |
| Raw meat (abattoirs, retail, restaurants)             | 450 | Ethiopia | a1.1    | 10 (2.2)  |                                                                                | [101] |
| Raw meat (retail)                                     | 432 | Nigeria  | a1.1, c | 7 (1.6)   | Chicken meat (3); beef meat (4)                                                | [102] |
| Raw buffalo meat                                      | 100 | Egypt    | a6      | 1 (1)     |                                                                                | [103] |
| Raw cow milk (farm)                                   | 68  | Turkey   | a1.1    | 3 (4.4)   |                                                                                | [120] |
| Raw goat meat and offal (retail)                      | 20  | Egypt    | a6, c   | 4 (20.0)  | Liver (1); kidney (1); rumen (2)                                               | [125] |
| Sandwiches in MAP (automatic distributors and retail) | 24  | Italy    | b       | 3 (12.5)  |                                                                                | [150] |
| Raw milk (dairy farms)                                | 120 | Sudan    | a1.1    | 2 (1.7)   |                                                                                | [129] |
| Fresh seafood                                         | 350 | Iran     | a1.1, c | 8 (2.3)   | Fish (3); shrimp (2); lobster (2); crab (1)                                    | [83]  |

|                                                   |     |          |         |           |                                             |       |
|---------------------------------------------------|-----|----------|---------|-----------|---------------------------------------------|-------|
| Fresh and frozen fish (gills and muscle)          | 510 | Jordan   | b, c    | 21 (4.1)  | Fresh fish (16); frozen fish (5)            | [84]  |
| Raw milk (dairy farm) and dairy products (retail) | 482 | Ethiopia | a1.1    | 6 (1.2)   |                                             | [130] |
| Raw ewe milk (farms)                              | 325 | Greece   | a1.1, c | 3 (0.9)   |                                             | [123] |
| Soft and hard cheeses (retail)                    | 225 | Egypt    | a3, c   | 48 (21.3) | Soft cheese (34); artisan hard cheeses (14) | [69]  |

<sup>1</sup>Test methods used: a1.1, ISO 11290-1, a1.2, ISO 11290-2; a1, both of them; a2, USDA; a3, FDA; a4, AOAC; a5, AFNOR; a6, other; a7, MPN enumeration; b, non-standard test method (e. g. internal laboratory methods and modified standard procedures); c, PCR confirmation of *Listeria* spp. and identification of *L. monocytogenes* serotypes; c1, DNA hybridization test.

IMS: Immunomagnetic separation.

RTE: ready to eat
